# Supplementary material
Source: PubMed Central journal article supplement (PMC2856248)

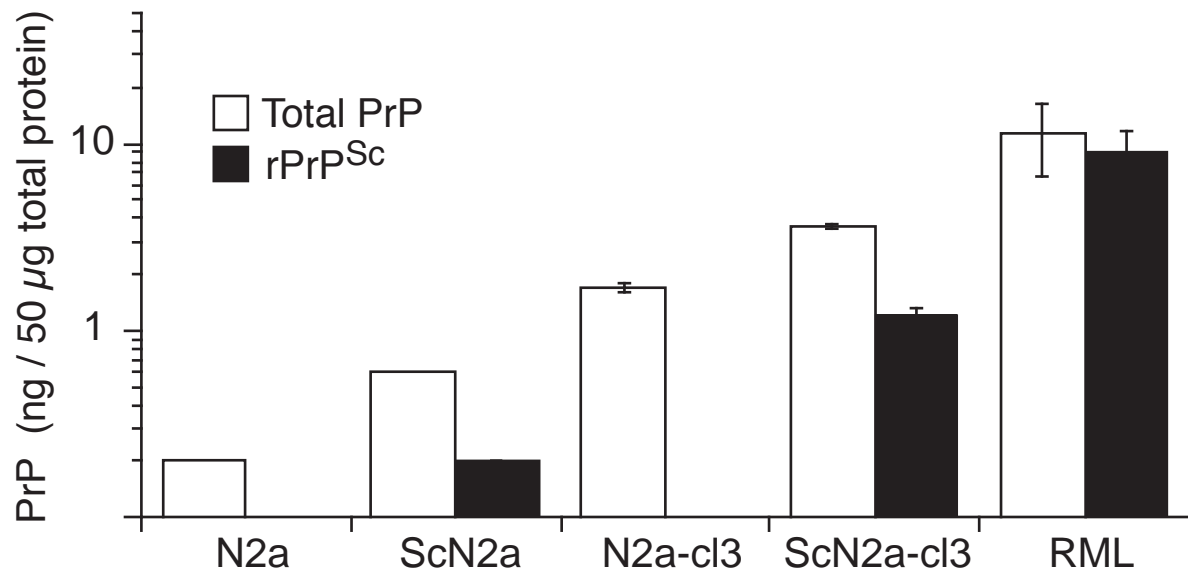

Supplement: supp_M109.045112_jbc.M109.045112-2.pdf [file supp_M109.045112_jbc.M109.045112-2.pdf]

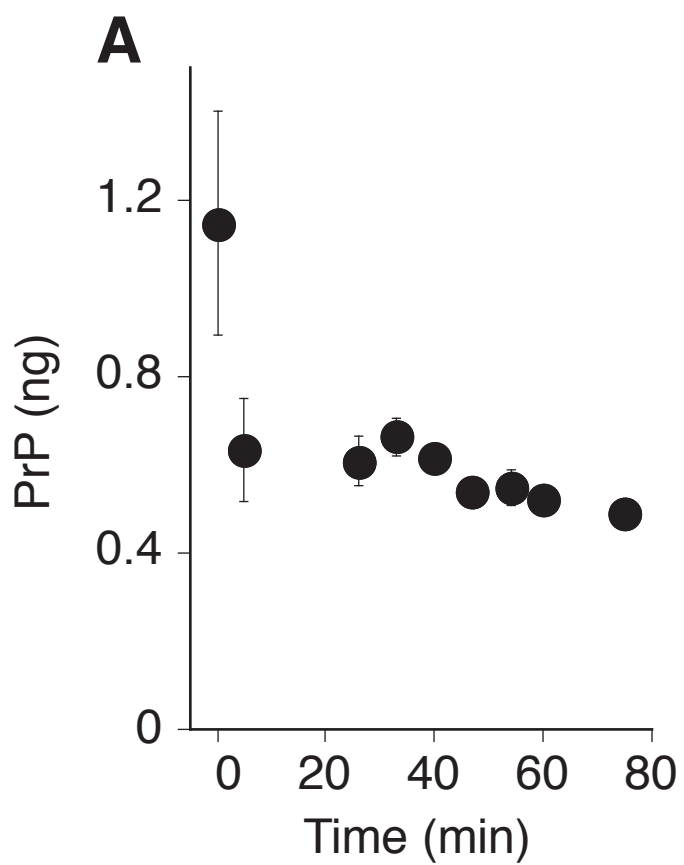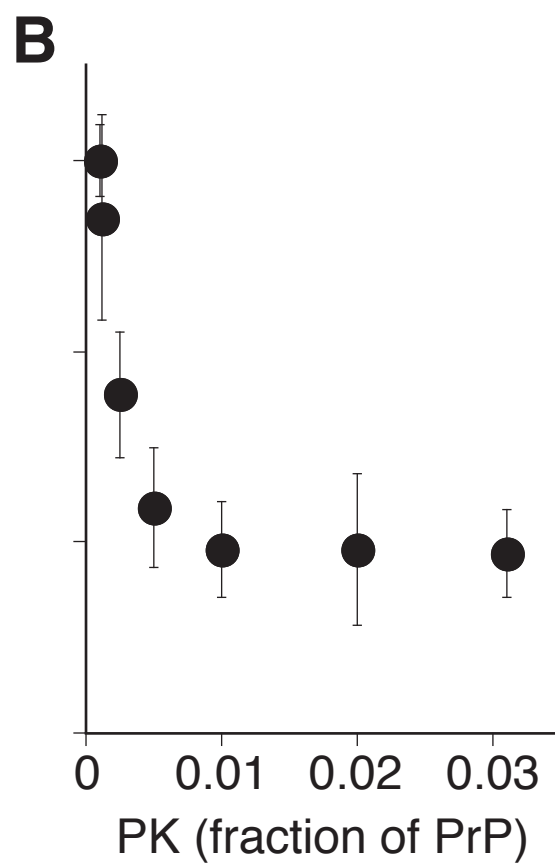

Supplement: supp_M109.045112_jbc.M109.045112-3.pdf [file supp_M109.045112_jbc.M109.045112-3.pdf]

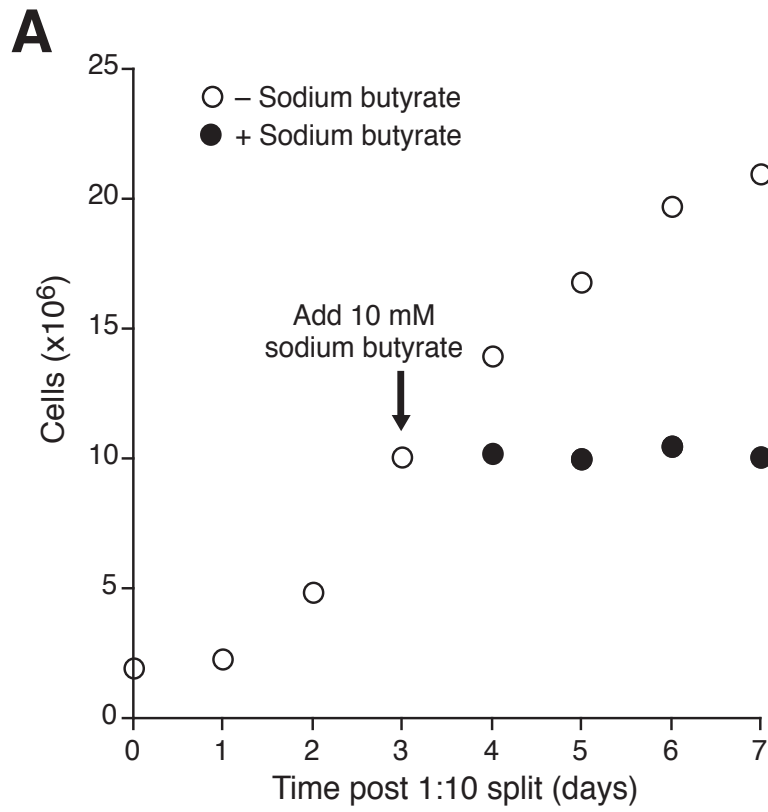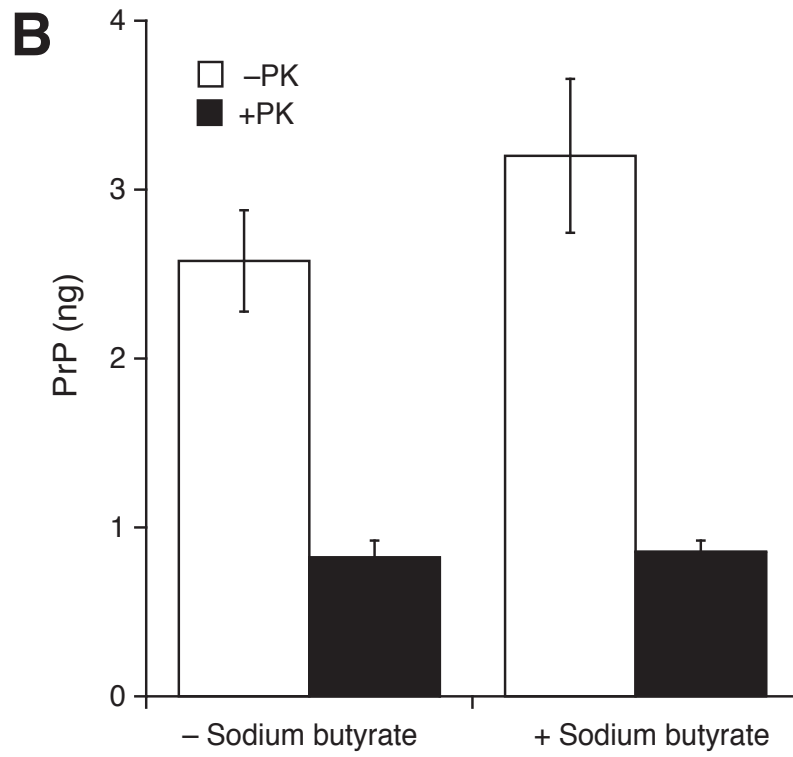

Supplement: supp_M109.045112_jbc.M109.045112-4.pdf [file supp_M109.045112_jbc.M109.045112-4.pdf]

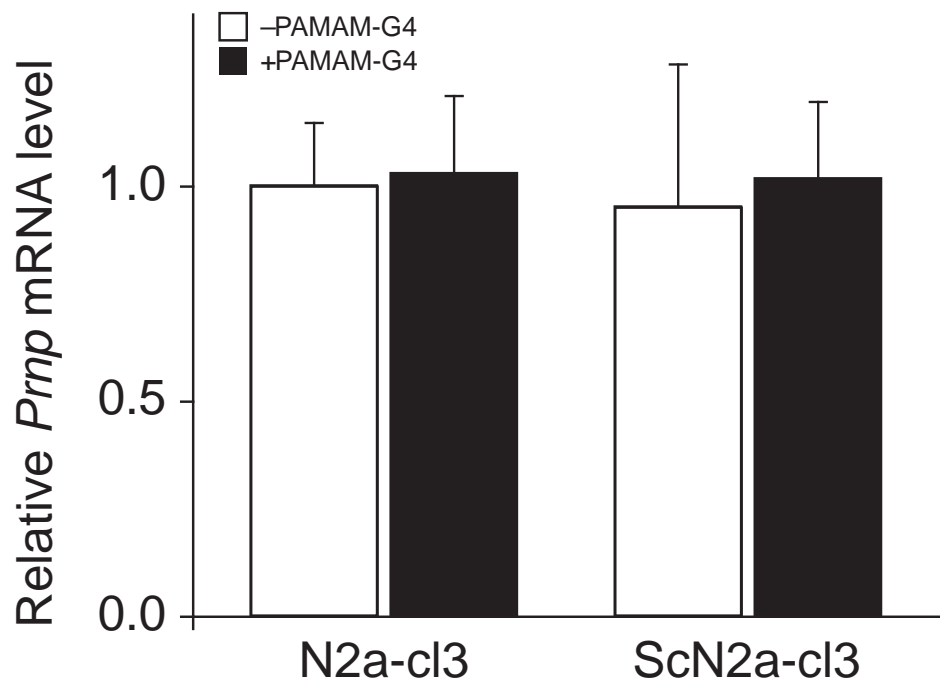

Supplement: supp_M109.045112_jbc.M109.045112-5.pdf [file supp_M109.045112_jbc.M109.045112-5.pdf]

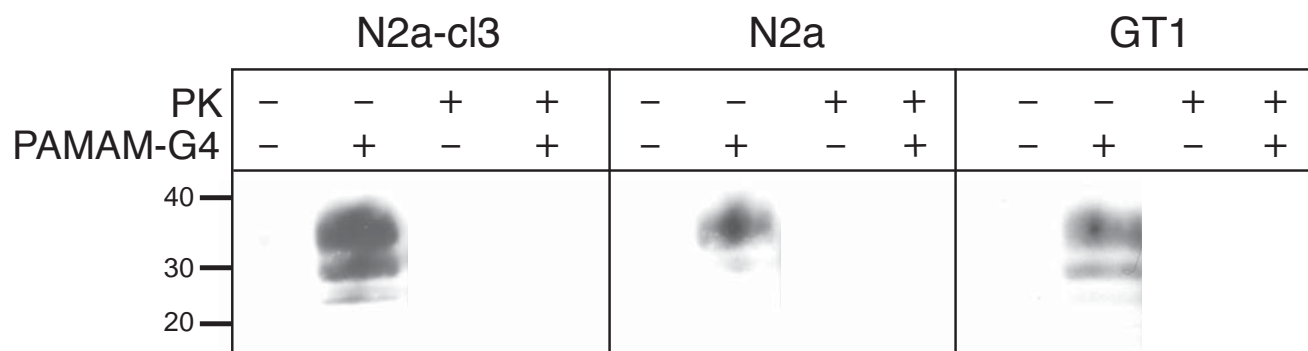

Supplement: supp_M109.045112_jbc.M109.045112-6.pdf [file supp_M109.045112_jbc.M109.045112-6.pdf]

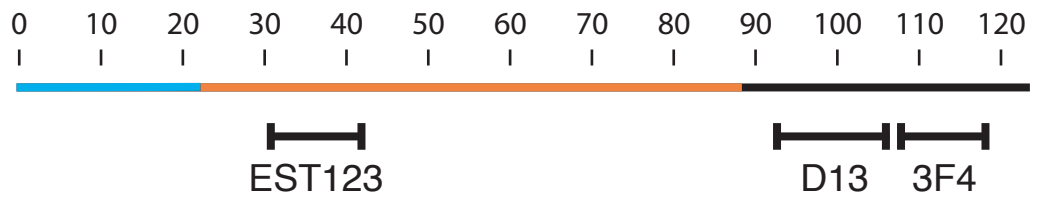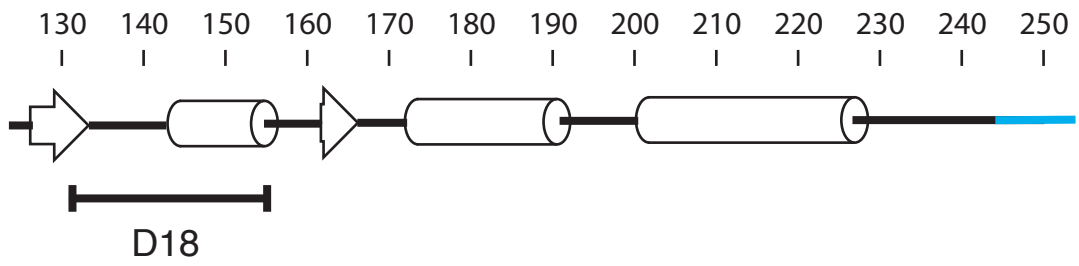

Supplement: supp_M109.045112_jbc.M109.045112-7.pdf [file supp_M109.045112_jbc.M109.045112-7.pdf]

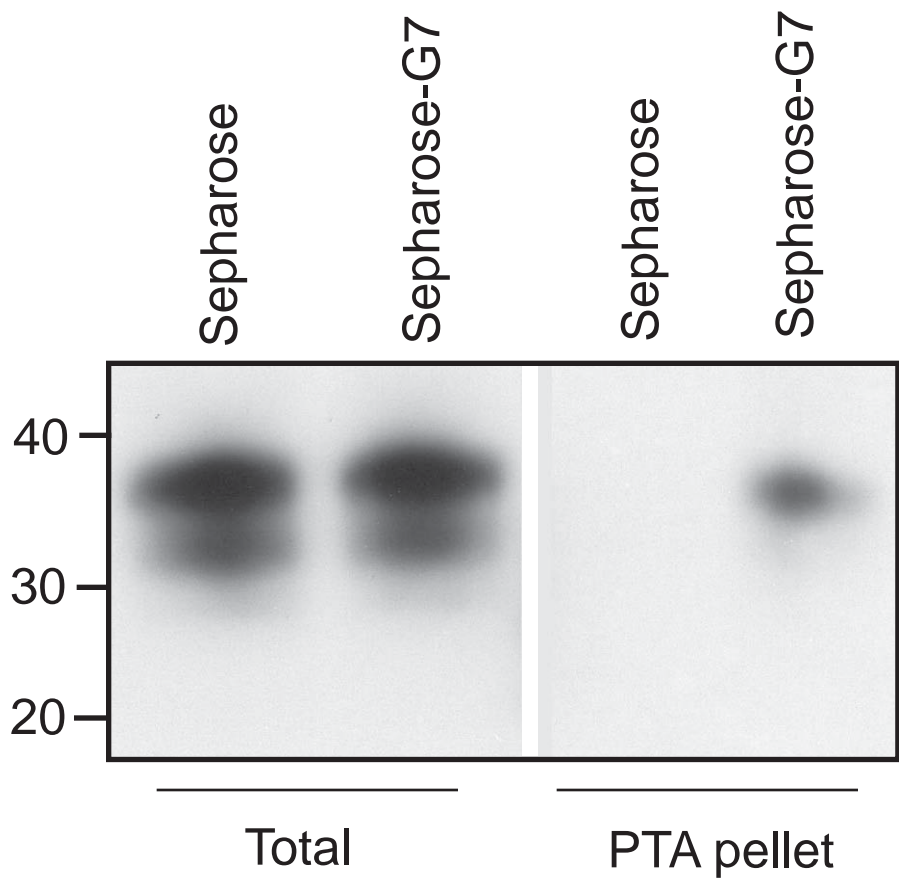

Supplement: supp_M109.045112_jbc.M109.045112-8.pdf [file supp_M109.045112_jbc.M109.045112-8.pdf]

A

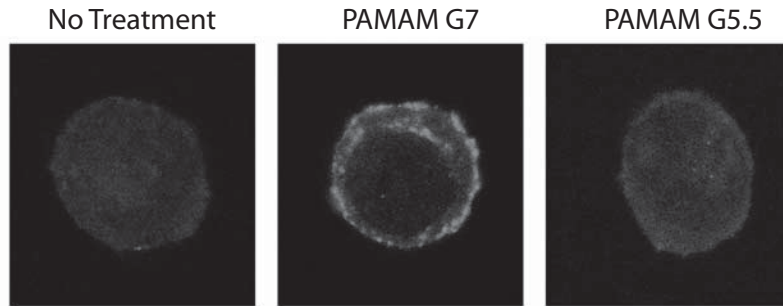

B

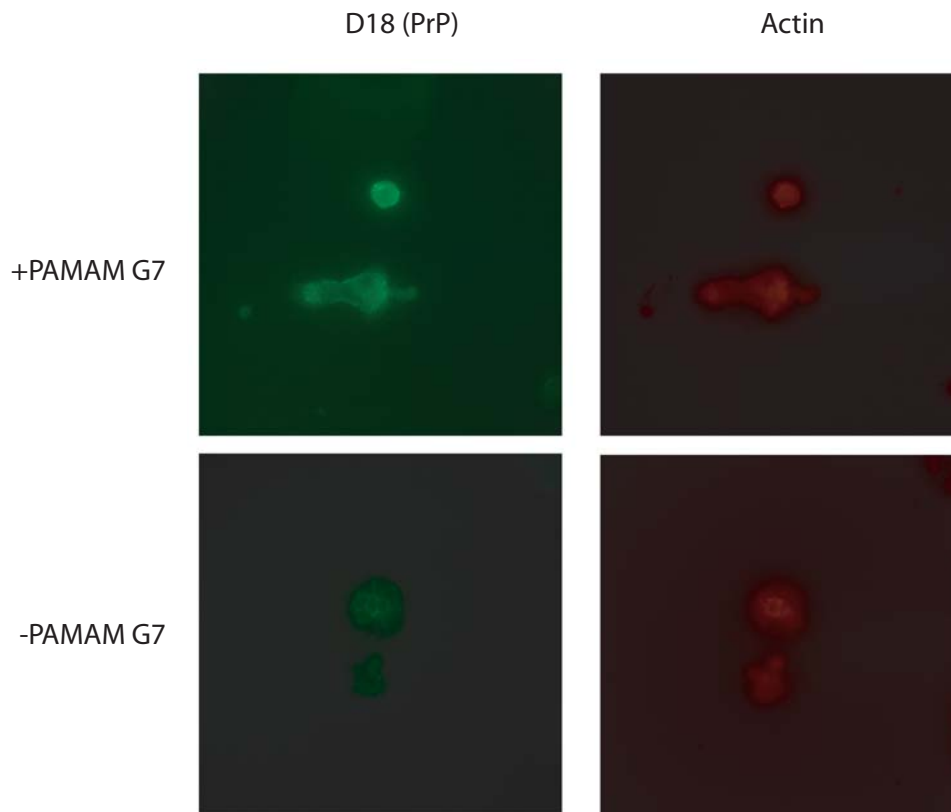

Supplement: supp_M109.045112_jbc.M109.045112-9.pdf [file supp_M109.045112_jbc.M109.045112-9.pdf]
